# Supplementary material for: miR-10a Regulates Proliferation of Human Cardiomyocyte Progenitor Cells by Targeting GATA6
Source: PubMed Central journal article supplement (PMC4113387; doi:10.1371/journal.pone.0103097), 2014-07-28

## **Supplementary Figure Legends**

### **Figure S1. Influence of miR-10a mimics or inhibitor on hCMPC viability.**

Different concentration of oligonucleotides were transfected into hCMPC, which then were used for CCK-8 test. \*P<0.05, n=6.

### **Figure S2. miR-10a mimics or inhibitor changes expression level of miR-10a.**

hCMPC were transfected with 50nM miR-10a mimics or inhibitor, and proceeded to miR-10a expression detection by RT/PCR. \*P<0.05, n=5.

### **Figure S3. miR-10a decreases the proliferation of hCMPCs.**

A. Representative image of hCMPCs transfected with mock, miR-10a mimics or inhibitor stained with crystal violet. to count cell numbers ( $\times 200$ ). B. Quantify of the cell counting experiment showed miR-10a mimics decreased the hCMPCs proliferation. \*P<0.05, n=3.

### **Figure S4. miR-10a decreases hCMPCs proliferation without affects cell**

**apoptosis.** The protein expression of caspase 3 was detected in the hCMPCs which were transfected with miR-10a mimics and an unrelated-oligo. n=3.

### **Figure S5. GATA6 rescues the proliferation phenotype of miR-10a in hCMPC.**

Representative images for EdU incorporation are showed ( $\times 200$ ).

Figure S1

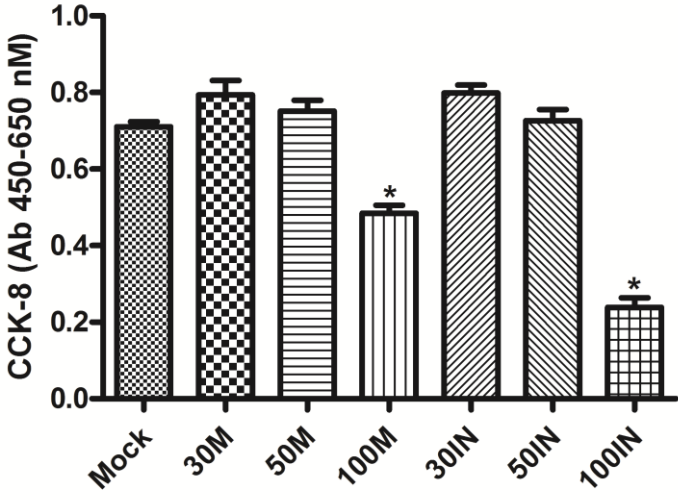

**Figure S2**

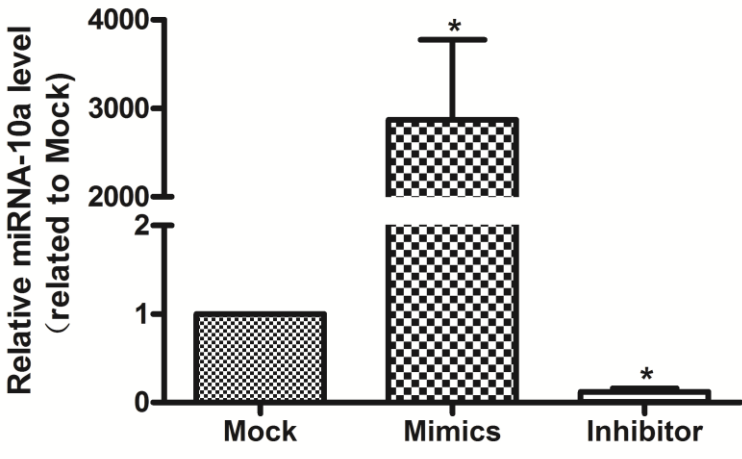

**Figure S3**

**A**

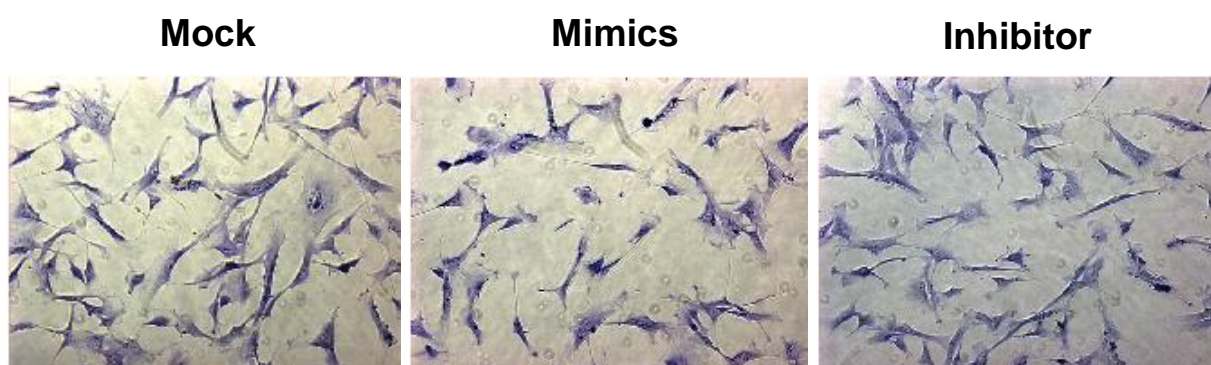

**B**

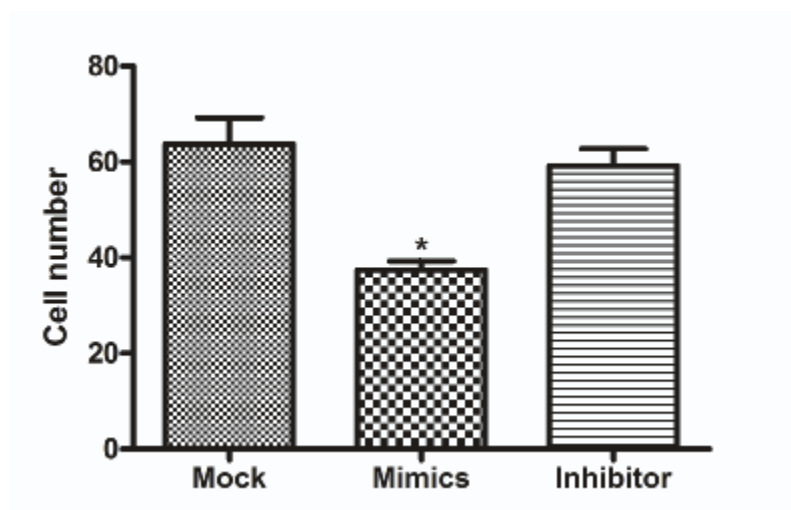

**Figure S4**

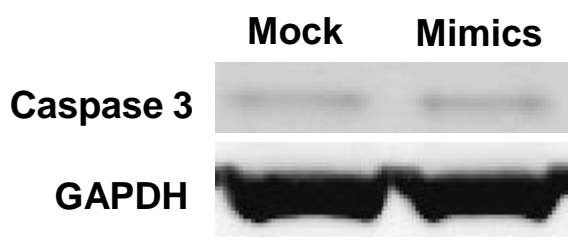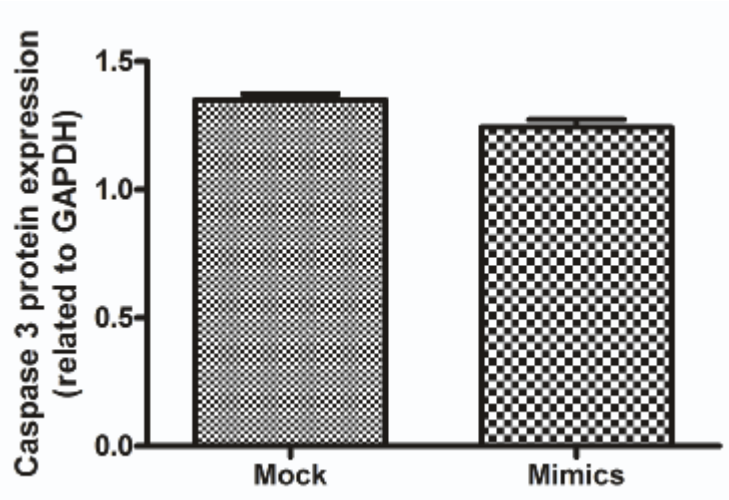

**Figure S5**

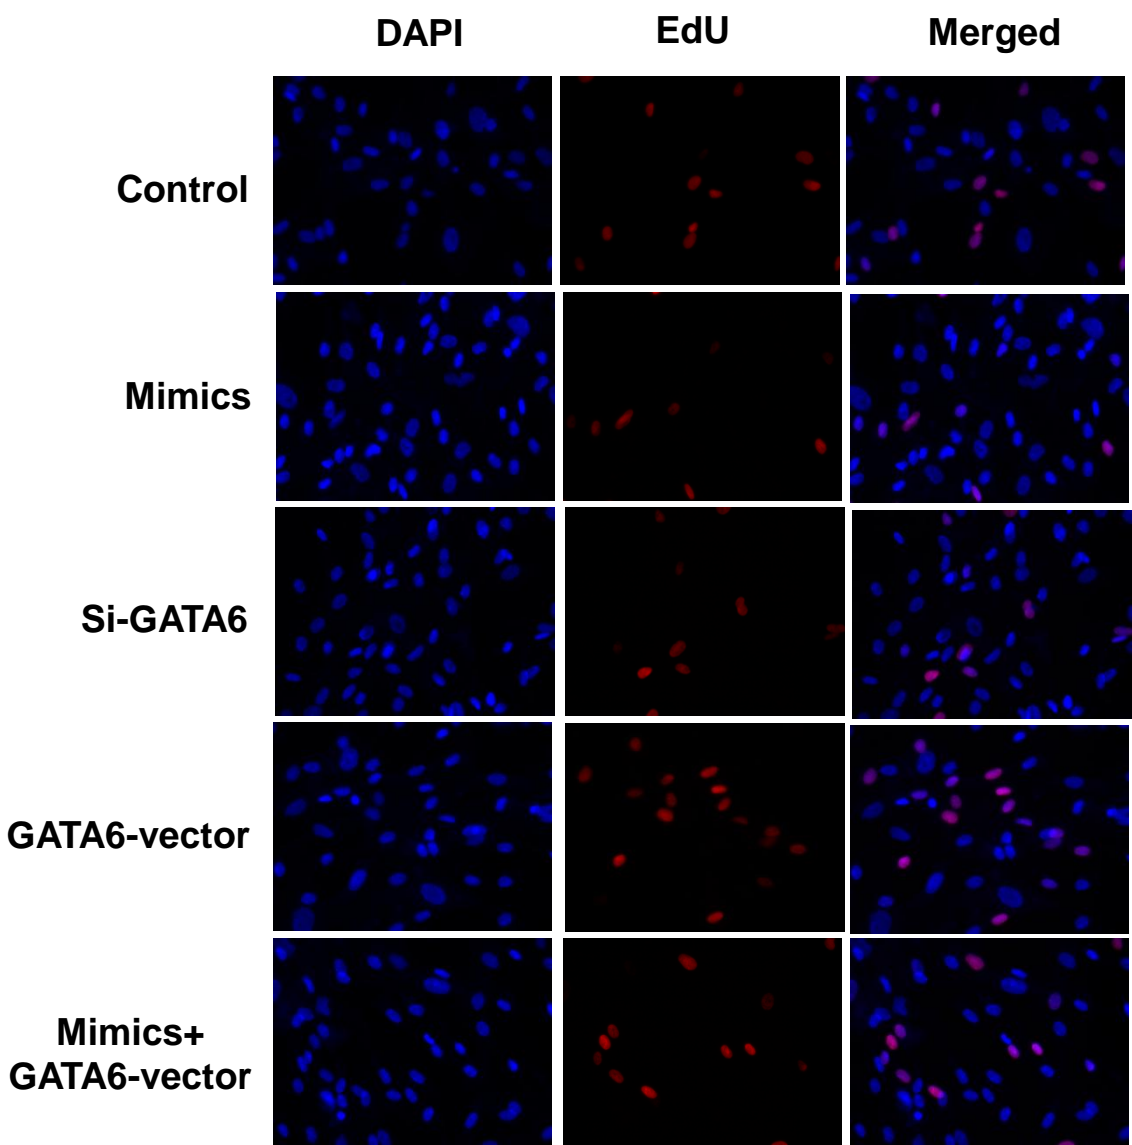

Supplement: pone.0103097.s001.pdf [file pone.0103097.s001.pdf]
